# Supplementary material for: Neuronal Firing Sensitivity to Morphologic and Active Membrane Parameters
Source: PLOS journal article supplement (doi:10.1371/journal.pcbi.0040011), 2008-01-15
Supplement: S1 (10.1371/journal.pcbi.0040011.s001) [file journal.pcbi.0040011.s001]

**Supporting Table S1. Parameter values used to generate the target data.** These parameters, used in the mathematical model of Equations (1)-(3), generated the single compartment model output ‘target data’ against which the optimized compartment models were fitted.

| Ion Channel | (mS/cm2) | Passive Parameters | |
| --- | --- | --- | --- |
| Na | 10 | (mS/cm2) | 0.3 |
| K | 4 | Cm (F/cm2) | 1 |
| A | 0 | radius (m) | 15.5 |
| Ca | 0.25 | Calcium Parameters | |
| K-Ca | 1 | *Kp* (M-cm2/mC) | 0.05 |
| NaP | 0.05 | *R* (ms-1) | 0.0125 |
